# Supplementary material
Source: PubMed Central journal article supplement (PMC1895986)

Expressed Protein  
(Myc-tagged)

Primary antibody

seedling

$\alpha$ -tubulin

Myc

merge

TUA6<sup>WT</sup>

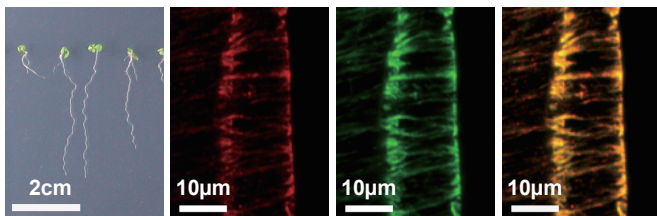

TUA6<sup>D205N</sup>

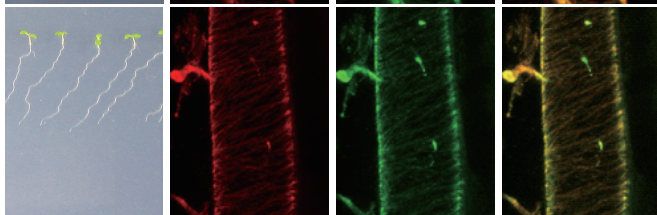

TUA6<sup>D251N</sup>

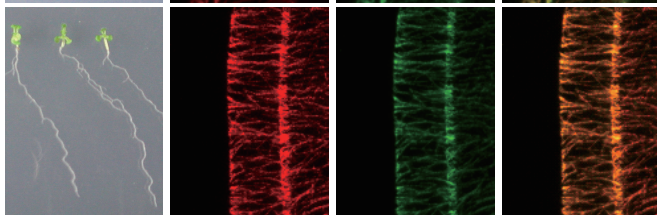

TUB4<sup>WT</sup>

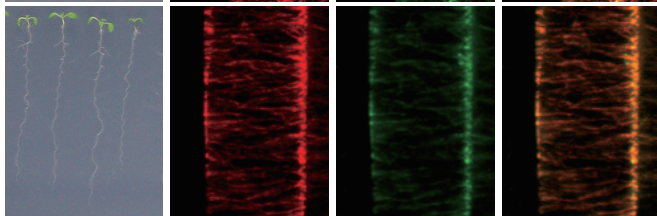

TUB4<sup>E288K</sup>

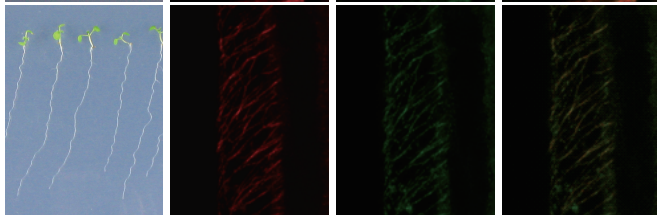

TUB4<sup>P287L</sup>

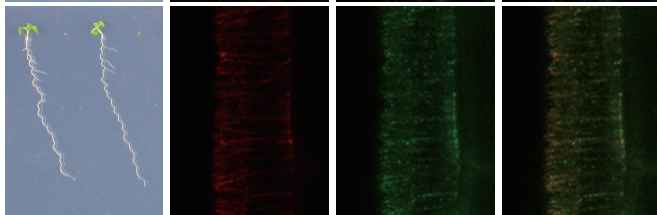

Supplement: pnas_0701224104_2.pdf [file pnas_0701224104_2.pdf]
