# Supplementary material
Source: PubMed Central journal article supplement (PMC1895986)
Supplement: pnas_0701224104_3.pdf [file pnas_0701224104_3.pdf]

# A. $\alpha$ -tubulin

PigTUA 1 MRECSISIHVGGAGVGIAGNACWELYCLEHGIQPDGQMSDKTIGGGDSFNTHFFSETGAGK  
 AtTUA1 1 . . . I . . . I . . . I . V . S . . . . . T . . . S . V . ACH . A . . . . . SS . Q  
 AtTUA2 1 . . . . . I . . . . . V . . . . . V . . . . . A . . . . .  
 AtTUA3 1 . . . I . . . I . V . S . . . . . M . . . T . V . VAH . A . . . . .  
 AtTUA4 1 . . . . . I . . . . . I . V . S . . . . . V . . . . . A . . . . .  
 AtTUA5 1 . . . I . . . I . V . S . . . . . M . . . T . V . VAH . A . . . . .  
 AtTUA6 1 . . . . . I . . . . . I . V . . . . . G . V . . . . . A . . . . .

PigTUA 61 HVPRFVADLEPTVIQDEVRTGTYRQLFHPFQLITGKEDAAANNRYGHYTIQKEIILDLVDL  
 AtTUA1 61 . . . . . L . . . . . S . . . . . F . . . . . V . R . V . TC . E  
 AtTUA2 61 . . . . . S . . . . . S . . . . . F . . . . . V . . . . . C . . . . .  
 AtTUA3 61 . . . . . S . . . . . F . . . . . V . . . . . V . . . . . C . . . . .  
 AtTUA4 61 . . . . . S . . . . . F . . . . . V . . . . . V . . . . . C . . . . .  
 AtTUA5 61 . . . . . S . . . . . F . . . . . V . . . . . V . . . . . C . . . . .  
 AtTUA6 61 . . . . . S . . . . . F . . . . . V . . . . . V . . . . . C . . . . .

PigTUA 121 RIRKLADQGTGLQGFVSVFHSFGGGTSGFTSLMLERLSDVYGKSKLEFSIYPAPVQSTA  
 AtTUA1 121 . L . . . N . . . L . NAV . LG . L . F . . . G . T . S . . .  
 AtTUA2 121 . . . N . . . L . NAV . LG . L . G . TV . S . . . S  
 AtTUA3 121 . V . . . N . . . L . NAV . LG . L . G . T . S . . . S  
 AtTUA4 121 . . . N . . . L . NAV . LG . L . G . TV . S . . . S  
 AtTUA5 121 . V . . . N . . . L . NAV . LG . L . G . T . S . . . S  
 AtTUA6 121 . . . N . . . L . NAV . LG . L . G . TV . S . . . S

PigTUA 181 WPEPNSILTHHTLHSDCAFVNDEAIYICRRNLDIERPTYTNLNRILGIVSSITA  
 AtTUA1 181 . . . V . S . SL . . T . VVLL . . . . . S . . . . . S . TI . L . T  
 AtTUA2 181 . . . V . S . SL . . T . VVLL . . . . . S . . . . . VS . VI . L . T  
 AtTUA3 181 . . . V . S . SL . . T . VVLL . . . . . S . . . . . S . I . L . T  
 AtTUA4 181 . . . V . S . SL . . T . VVLL . . . . . S . . . . . VS . VI . L . T  
 AtTUA5 181 . . . V . S . SL . . T . VVLL . . . . . S . . . . . S . I . L . T  
 AtTUA6 181 . . . . . V . S . SL . . T . VVLL . . . . . S . N . . . . . VS . VI . L . T

PigTUA 241 SLRFDAGLNVDLTFEOTNLVYPRPHFLATYAPVISAKEYHEQLSVAEITINACFEPAN  
 AtTUA1 241 . . . . . I . . . I . . . I . M . SS . . SA . . F . P . . TSV . . S .  
 AtTUA2 241 . . . . . V . . . . . I . M . SS . . F . . . . . SA . . . . . S .  
 AtTUA3 241 . . . . . I . . . I . . . I . M . SS . . A . . P . . V . . S .  
 AtTUA4 241 . . . . . V . . . . . I . M . SS . . F . . . . . SA . . . . . S .  
 AtTUA5 241 . . . . . I . . . I . . . I . M . SS . . A . . P . . V . . S .  
 AtTUA6 241 . . . . . V . . . . . I . M . SS . . F . . . . . SA . . . . . S .

PigTUA 301 QMVKDPRHGKYMAGCLLYRQDVFVFKDVAIAITIKTRTIQFVDWCPITGFKVGINPEPP  
 AtTUA1 301 M . A . . . . . M . . . . . T . V . A . A . . . . . C . . . . . Q . . .  
 AtTUA2 301 M . A . . . . . M . . . . . VG . . . . . V . . . . . C . . . . . Q . . .  
 AtTUA3 301 M . A . . . . . M . . . . . VG . . . . . V . . . . . C . . . . . Q . . .  
 AtTUA4 301 M . A . . . . . M . . . . . VG . . . . . V . . . . . C . . . . . Q . . .  
 AtTUA5 301 M . A . . . . . M . . . . . VG . . . . . V . . . . . C . . . . . Q . . .  
 AtTUA6 301 M . A . . . . . M . . . . . VG . . . . . V . . . . . C . . . . . Q . . .

PigTUA 361 TVPFGDGLAKVORAVCMLSNITIAEAEARLDHKFDLMYAKRAFVHWYVGEEMGEFSE  
 AtTUA1 361 S . . . . . I . . N . V . VFS . I . . . . . S . . . . .  
 AtTUA2 361 . . . . . I . . S . V . VFS . I . . . . .  
 AtTUA3 361 . . . . . I . . N . V . VFS . I . . . . .  
 AtTUA4 361 . . . . . I . . S . V . VFS . I . . . . .  
 AtTUA5 361 . . . . . I . . N . V . VFS . I . . . . .  
 AtTUA6 361 . . . . . I . . S . V . VFS . I . . . . .

PigTUA 421 AREDMAALEKQYEEVGVDSVEGEHEEEEEEY  
 AtTUA1 421 . . . L . . . . . GEGA . DD . D . . . . .  
 AtTUA2 421 . . . L . . . . . AEGDD . DD . . . . .  
 AtTUA3 421 . . . L . . . . . AEGDD . DD . . . . .  
 AtTUA4 421 . . . L . . . . . AEGDD . DD . . . . .  
 AtTUA5 421 . . . L . . . . . AEGDD . DD . . . . .  
 AtTUA6 421 . . . L . . . . . AEGDD . DD . . . . .

# B. $\beta$ -tubulin

PigTUB 1 MREIVHIQAGCGGQIIGAKFWEVISEHGIQDPTGSHYDGS-DLQLERINVVYNEAGNKY  
 AtTUB1 1 . . . L . V . G . . . S . . . G . . V . . R . N . . A . . . . . S . GR .  
 AtTUB2 1 . . . L . . . G . . . VCA . . . R . T . . . . . SCGRF .  
 AtTUB3 1 . . . L . . . G . . . VCA . . . R . T . . . . . SCGRF .  
 AtTUB4 1 . . . L . . . G . . . C . . . H . . Q . W . . -P . . . D . F . . S . G .  
 AtTUB5 1 . . . L . . . G . . . S . . . C . . . S . . R . S . TA . . . . . S . GR .  
 AtTUB6 1 . . . L . . . G . . . S . . . VC . . . R . V . N . . V . . . . . SCGR .  
 AtTUB7 1 . . . L . . . G . . . S . . . VNL . . . Q . R . V . -E . . . V . . . . . SCGR .  
 AtTUB8 1 . . . L . . . G . . . VCA . . . S . R . Q . EN . . . V . . . . . SCGRF .  
 AtTUB9 1 . . . L . . . G . . . CG . . . Q . QSC . T . . . . . F . . S . G .

PigTUB 60 VPRAILVDLEPGTMSVRSRGPFGIIFRPNDFVFGQSGAGNNAKGHYTEGAELVDSVDV  
 AtTUB1 61 . . . V . M . . . . . I . . . . . Y . . . . . I . A . . . . .  
 AtTUB2 61 . . . V . M . . . . . L . . . . . Y . T . . . . . I . . . . .  
 AtTUB3 61 . . . V . M . . . . . L . . . . . Y . T . . . . . I . . . . .  
 AtTUB4 61 . . . V . M . . . . . L . . . . . Y . T . . . . . I . . . . .  
 AtTUB5 61 . . . V . M . . . . . I . . . . . Y . . . . . I . A . . . . .  
 AtTUB6 61 . . . V . M . . . . . T . . . . . Y . . . . . I . A . . . . .  
 AtTUB7 61 . . . V . M . . . . . Y . . . . . Y . . . . . I . . . . .  
 AtTUB8 61 . . . V . M . . . . . Y . . . . . Y . . . . . I . . . . .  
 AtTUB9 61 . . . V . M . . . . . L . . . . . Y . . . . . I . . . . .

PigTUB 120 VRKESESCDGLQFTHLSGGGTGSGMTLLISKIREEYPRIMNFTSVVSPKVKSDTV  
 AtTUB1 121 . . . A . N . . . . . VC . . . . . M . L . F . . . . .  
 AtTUB2 121 . . . A . N . . . . . VC . . . . . M . L . F . . . . .  
 AtTUB3 121 . . . A . N . . . . . VC . . . . . M . L . F . . . . .  
 AtTUB4 121 . . . A . NS . . . . . VC . . . . . M . M . F . . . . .  
 AtTUB5 121 . . . A . N . . . . . VC . . . . . M . L . F . . . . .  
 AtTUB6 121 . . . A . N . . . . . VC . . . . . M . L . F . . . . .  
 AtTUB7 121 . . . A . N . . . . . VC . . . . . M . M . F . . . . .  
 AtTUB8 121 . . . A . N . . . . . VC . . . . . M . L . F . . . . .  
 AtTUB9 121 . . . A . N . . . . . VC . . . . . M . M . F . . . . .

PigTUB 180 VEPYNATLSVHVLVNDYETDICYIDNEALYDIFCRTLKLTPTYGDLNHLVSATMSGVTTC  
 AtTUB1 181 . . . . . A . CMWL . . . . . S . SF . . . I . . . . . CS  
 AtTUB2 181 . . . . . A . CMWL . . . . . SF . . . . . I . . . . . C  
 AtTUB3 181 . . . . . A . CMWL . . . . . SF . . . . . I . . . . . C  
 AtTUB4 181 . . . . . A . CMWL . . . . . AN . F . . I . . . . . C  
 AtTUB5 181 . . . . . A . CMWL . . . . . S . SF . . . I . . . . . CS  
 AtTUB6 181 . . . . . A . CMWL . . . . . SF . . . . . I . . . . . C  
 AtTUB7 181 . . . . . A . CMWL . . . . . S . SF . . . I . . . . . C  
 AtTUB8 181 . . . . . A . CMWL . . . . . SF . . . . . I . . . . . C  
 AtTUB9 181 . . . . . A . CMWL . . . . . AN . F . . I . . . . . C

PigTUB 240 LRFPGLNADLRKLAVNMPPFRLLHFFMPGFAPLTSRSGQOYRALVPELTQOOFDAKMN  
 AtTUB1 241 . . . S . . . L . I . . . V . . . IS . . . W . . . . .  
 AtTUB2 241 . . . S . . . L . I . . . V . . . S . . . F . . . W . . . . .  
 AtTUB3 241 . . . S . . . L . I . . . V . . . S . . . W . . . . .  
 AtTUB4 241 . . . S . . . L . I . . . V . . . S . . . S . . . W . . . . .  
 AtTUB5 241 . . . S . . . L . I . . . V . . . IS . . . W . . . . .  
 AtTUB6 241 . . . S . . . L . I . . . V . . . W . . . . .  
 AtTUB7 241 . . . S . . . L . I . . . V . . . N . . . W . . . . .  
 AtTUB8 241 . . . S . . . L . I . . . V . . . W . . . . .  
 AtTUB9 241 . . . S . . . L . I . . . V . . . S . . . S . . . W . . . . .

PigTUB 300 MAACDPRHGRYLTVAAVFRGRMSKEVDEQMLNVQNKNSYFVEVIPNNVKTAVCDIPPR  
 AtTUB1 301 . C . A . . . . . AS . M . . K . T . . . . . SS . . . . . T  
 AtTUB2 300 . C . A . . . . . AS . M . . K . T . . . . . ST . . . . . T  
 AtTUB3 300 . C . A . . . . . AS . M . . K . T . . . . . ST . . . . . T  
 AtTUB4 300 . C . A . . . . . AS . . . . . KL . T . . . . . SS . . . . . A . K  
 AtTUB5 301 . C . A . . . . . AS . I . . Q . T . . . . . I . . . . . SS . . . . . K  
 AtTUB6 300 . C . A . . . . . AS . M . . K . T . . . . . SS . . . . . A . K  
 AtTUB7 300 . C . A . . . . . AS . M . . K . T . . . . . ST . . . . . T  
 AtTUB8 300 . C . A . . . . . AS . M . . K . T . . . . . ST . . . . . T  
 AtTUB9 300 . C . A . . . . . AS . . . . . K . T . . . . . SS . . . . . A . T

PigTUB 360 GLKMSATFIGNSTAIQELFKRISQFTAMFRKRALFHWYTGEMDEMEFTAEASNNDLV  
 AtTUB1 361 . I . AS . V . S . M . R . V . . . . .  
 AtTUB2 360 . . . AS . . . S . M . R . V . . . . .  
 AtTUB3 360 . . . AS . . . S . M . R . V . . . . .  
 AtTUB4 360 . . . AS . . . S . M . R . V . . . . .  
 AtTUB5 361 . . . A . . . V . S . M . R . V . . . . .  
 AtTUB6 360 . . . S . AS . . . S . M . R . V . . . . .  
 AtTUB7 360 . . . AS . . . S . M . R . V . . . . .  
 AtTUB8 360 . . . AS . . . S . M . R . V . . . . .  
 AtTUB9 360 . . . AS . . . S . M . R . V . . . . .

PigTUB 421 SEYOQYDATADEGEEFEEFEEDEEA  
 AtTUB1 421 . . . . . ED . YD . E . QVYES . . . . .  
 AtTUB2 421 . . . . . E . DY . -DE . G . YQEEFY . . . . .  
 AtTUB3 421 . . . . . E . DY . -DE . G . YQEEFY . . . . .  
 AtTUB4 420 A . . . . . G . E . Y . . E . Y . T . . . . .  
 AtTUB5 421 A . . . . . E . YD . E . EGDYET . . . . .  
 AtTUB6 420 . . . . . DE . Y . DED . E . ILDHE . . . . .  
 AtTUB7 420 . . . . . E . Y . -E . A . YEQEET . . . . .  
 AtTUB8 420 . . . . . EEGY . E . ED . V . VQEEQ . . . . .  
 AtTUB9 420 A . . . . . VG . E . Y . DE . E . . . . .
