# Supplementary material
Source: PubMed Central journal article supplement (PMC1895986)
Supplement: pnas_0701224104_6.pdf [file pnas_0701224104_6.pdf]

Table2 Tubulin mutants with helical growth phenotypes

| Tubulin | Mutation | Root slanting angle* | Phenotype <sup>†</sup> | Transgene experiment <sup>‡</sup> | Position <sup>§</sup> | Ecotype | Mutagen | Independent isolates |
|---------|----------|----------------------|------------------------|-----------------------------------|-----------------------|---------|---------|----------------------|
| Col-0   | -        | -4±3                 | -                      | -                                 | -                     | -       | -       | -                    |
| TUA4    | R2K      | 17±6                 | strong                 | Yes                               | near GAR              | Col,Ler | EMS     | 3                    |
| TUA2    | T56I     | NT (R)               | strong                 | Yes                               | Lateral               | Col     | EMS     | 2                    |
| TUA4    | T56I     | 37±4                 | strong                 | Yes                               | Lateral               | Col     | EMS     | 1                    |
| TUA6    | T56I     | 22±6                 | strong                 | Yes                               | Lateral               | Col,WS  | EMS     | 2                    |
| TUA4    | V62I     | 25±4                 | strong                 | Yes                               | Lateral               | Col     | EMS     | 1                    |
| TUA4    | S178Δ    | -46±5                | medium                 | Yes                               | Intardimer            | Col     | T-DNA   | 1                    |
| TUA3    | D205N    | -16±4                | weak                   | Yes                               | Others                | Col     | EMS     | 1                    |
| TUA5    | D251N    | 31±5                 | medium                 | Yes                               | GAR                   | Col     | EMS     | 1                    |
| TUA4    | M268I    | 52±5                 | medium                 | Yes                               | Lateral               | Col     | EMS     | 1                    |
| TUA4    | S277F    | 35±7                 | medium                 | Yes                               | Lateral               | Col     | EMS     | 1                    |
| TUA6    | S277F    | 13±4                 | weak                   | Yes                               | Lateral               | Col,WS  | EMS     | 3                    |
| TUA6    | A281T    | 49±6                 | medium                 | Yes                               | Lateral               | Col     | T-DNA   | 1                    |
| TUA2    | E284K    | 32±8                 | medium                 | Yes                               | Lateral               | Col     | EMS     | 1                    |
| TUA6    | P325S    | 44±81                | medium                 | Yes                               | Interdimer            | Col     | EMS     | 1                    |
| TUA2    | T349I    | -37±8                | medium                 | NT                                | Interdimer            | Col     | EMS     | 1                    |
| TUA4    | T349I    | NT (L)               | strong                 | NT                                | Interdimer            | Col     | EMS     | 1                    |
| TUA3    | R390W    | -9±5                 | weak                   | Yes                               | Others                | Col     | EMS     | 1                    |
| TUB1    | S96F     | 33±7                 | medium                 | Yes                               | Interdimer            | Col     | EMS     | 1                    |
| TUB4    | S95F     | NT (R)               | strong                 | Yes                               | Interdimer            | WS      | EMS     | 1                    |
| TUB4    | G96D     | 44±6                 | medium                 | NT                                | Interdimer            | Col     | EMS     | 1                    |
| TUB4    | T178I    | -47±10               | medium                 | Yes                               | Interdimer            | Col     | EMS     | 1                    |
| TUB4    | P220S    | 21±6                 | medium                 | Yes                               | Interdimer            | Col     | EMS     | 1                    |
| TUB2    | C239Y    | NT (L)               | strong                 | Yes                               | Others                | Col     | EMS     | 1                    |
| TUB1    | G245E    | NT (L)               | medium                 | NT                                | Others                | WS      | EMS     | 1                    |
| TUB4    | L250F    | -30±4                | medium                 | Yes                               | Intardimer            | Col     | EMS     | 1                    |
| TUB2    | P287L    | 8±5                  | strong                 | Yes                               | Lateral               | Col     | EMS     | 1                    |
| TUB3    | P287L    | 32±6                 | strong                 | Yes                               | Lateral               | Col,WS  | EMS     | 3                    |
| TUB4    | P287L    | NT (R)               | strong                 | Yes                               | Lateral               | Col     | EMS     | 1                    |
| TUB4    | E288K    | -35±8                | strong                 | Yes                               | Lateral               | Col     | EMS     | 1                    |
| TUB4    | A302V    | NT (L)               | medium                 | NT                                | Interdimer            | WS      | EMS     | 1                    |
| TUB4    | S351F    | -37±13               | medium                 | Yes                               | Intardimer            | Col     | EMS     | 1                    |
| TUB1    | A394T    | NT (L)               | medium                 | NT                                | Interdimer            | WS      | EMS     | 1                    |

\*Root slanting angles toward the right side of the agar plates are shown. Minus angles indicate that the roots skewed to the left. NT, slanting angles were not quantified. (R), right-handed twisting, (L), left-handed twisting.

<sup>†</sup>Severity of the cell expansion defects was arbitrarily classified into four groups; very strong, strong, medium, and weak. The weak-type mutants were semidominant in their growth responses to proyzamide, but their heterozygotes were indistinguishable in growth in the absence of the drug.

<sup>‡</sup>“Yes” indicates that the mutant tubulin gene expressed in wild-type *Arabidopsis* plants reproduced the twisting phenotypes. NT; not tested.

<sup>§</sup>Mutated residues were mapped on the tubulin heterodimer structure. “Lateral” positions indicate the interacting regions between adjacent protofilaments. GAR; GTPase-activating region.
