# Supplementary material
Source: PubMed Central journal article supplement (PMC1895986)

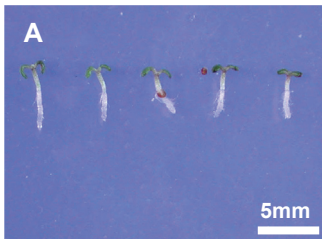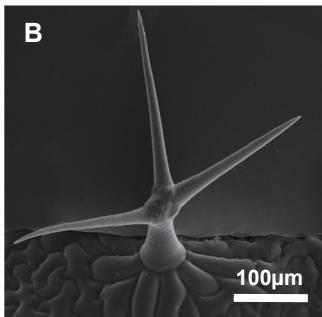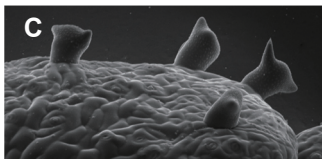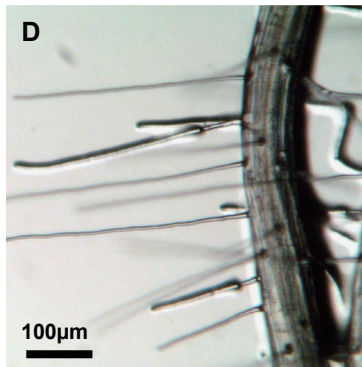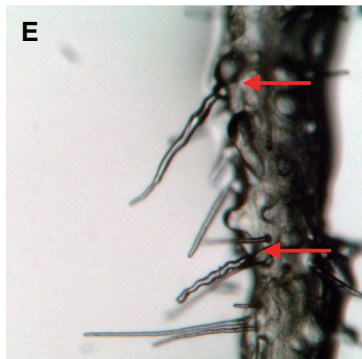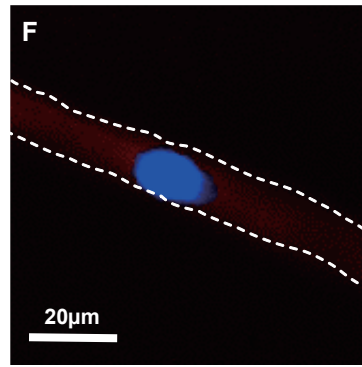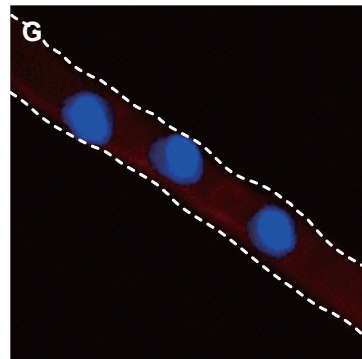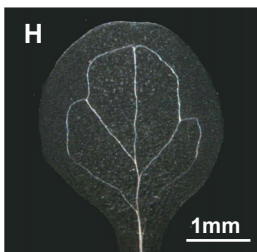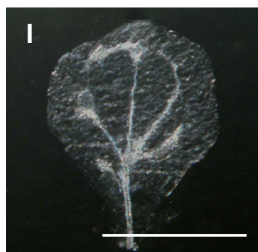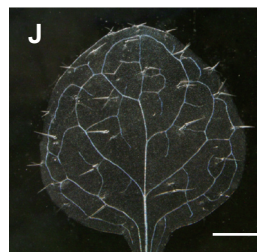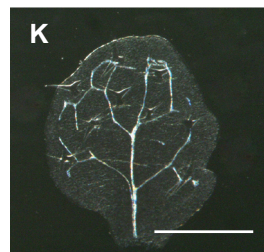

Supplement: pnas_0701224104_1.pdf [file pnas_0701224104_1.pdf]

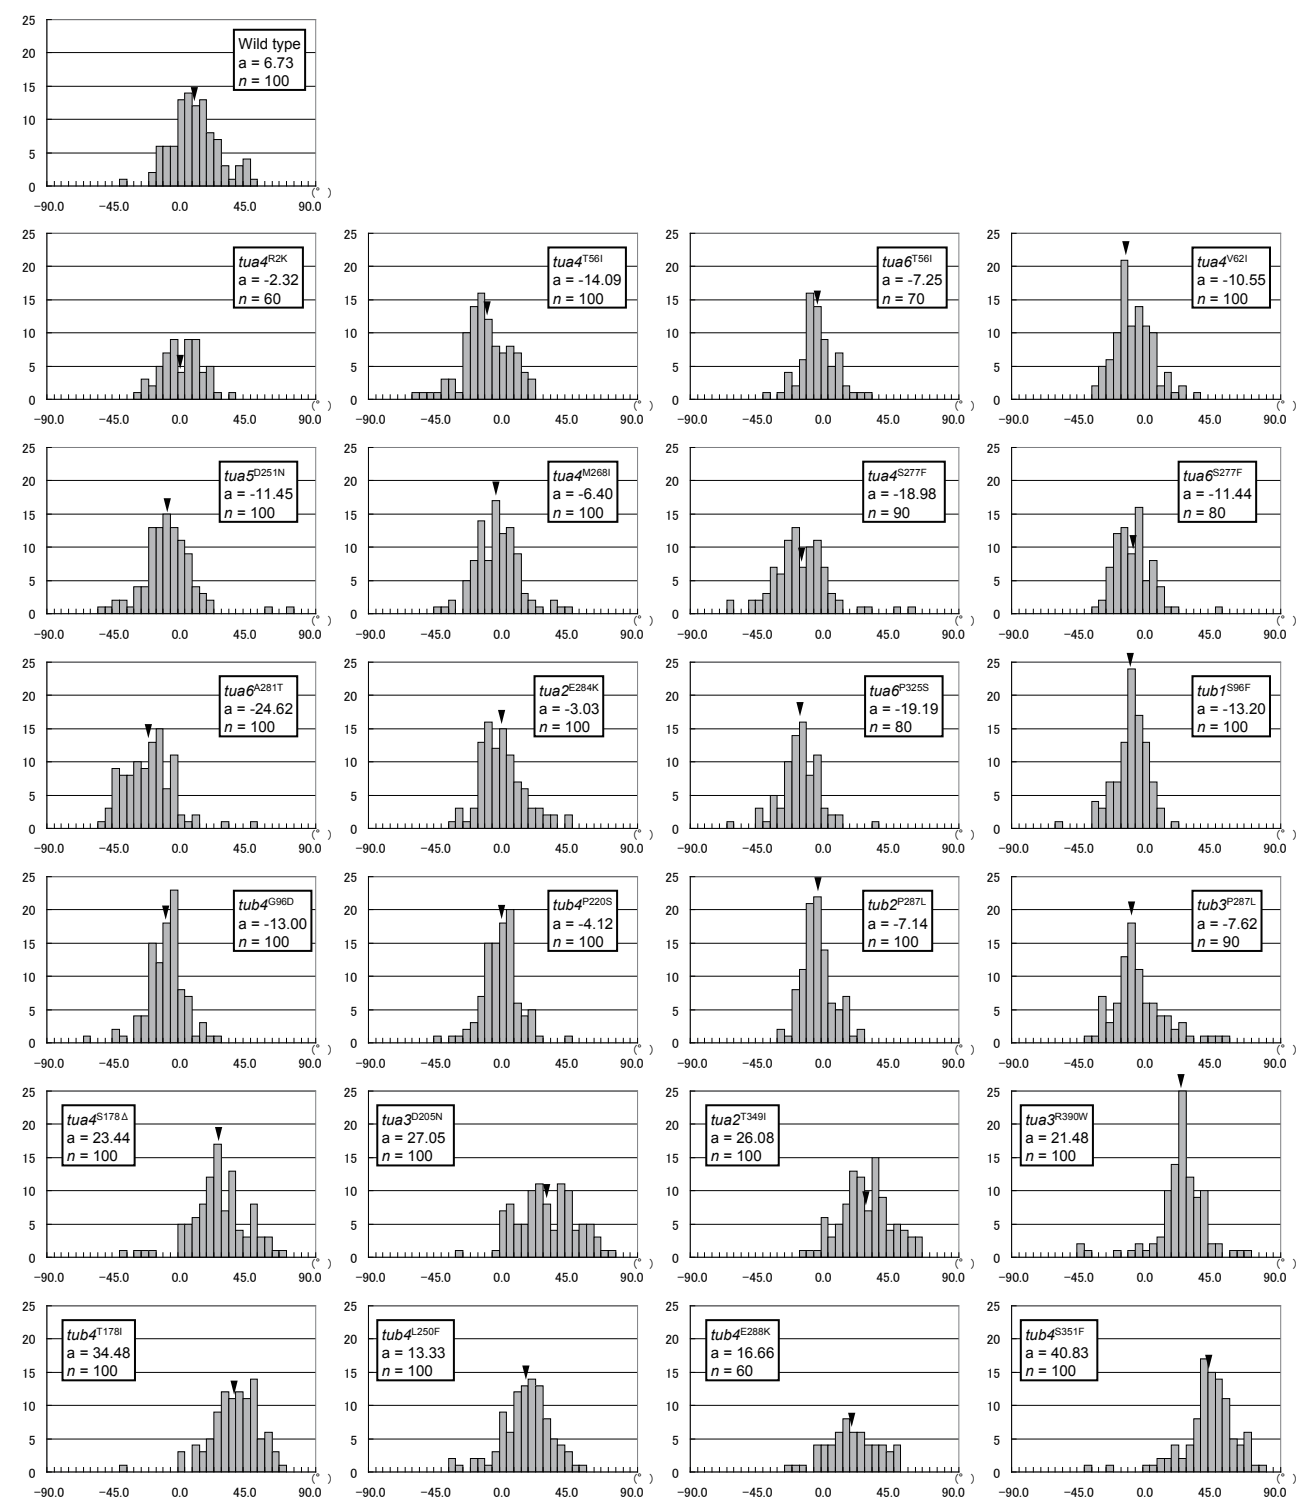

Supplement: pnas_0701224104_4.pdf [file pnas_0701224104_4.pdf]

A. GFP-EB1

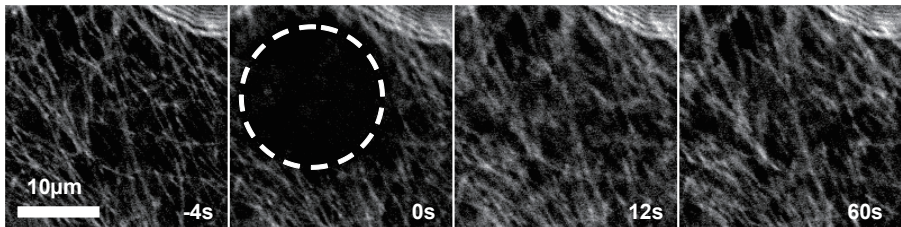

B. GFP-TUB6

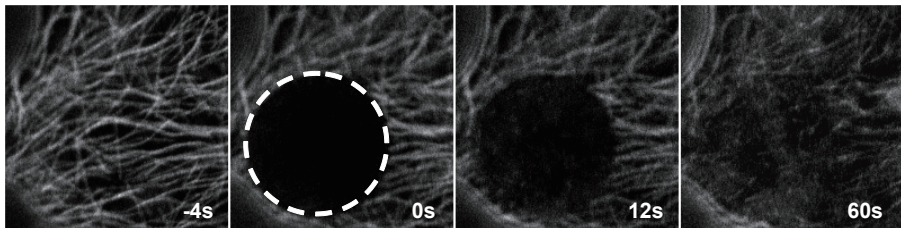

Supplement: pnas_0701224104_5.pdf [file pnas_0701224104_5.pdf]
